# Supplementary material
Source: HighWire-hosted journal article supplement (https://www.cmaj.ca/highwire/filestream/58687/field_highwire_adjunct_files/2/neo-steinhoff-3-at.pdf)
Supplement: neo-steinhoff-3-at.pdf [file neo-steinhoff-3-at.pdf]

**Appendix 3 (as supplied by authors). Proportion of full term infants with birth weight < 10<sup>th</sup> percentile using WHO standard**

|                      | Maternal Vaccine |         |     |           |                   |         |
|----------------------|------------------|---------|-----|-----------|-------------------|---------|
|                      | N                | Control | N   | Influenza | RR (95% CI)       | P Value |
| <b>All Seasons</b>   | 152              | 21.1%   | 151 | 13.3%     | 0.63 (0.38, 1.05) | 0.07    |
| <b>Before Jan 31</b> | 98               | 17.4%   | 95  | 14.7%     | 0.85 (0.44, 1.63) | 0.62    |
| <b>After Feb 1</b>   | 54               | 27.8%   | 56  | 10.7%     | 0.39 (0.16, 0.92) | 0.02    |

Birth weight less than the WHO tenth percentile was determined using WHO sex-specific tables at:

[http://www.who.int/childgrowth/standards/weight\\_for\\_age/en/index.html](http://www.who.int/childgrowth/standards/weight_for_age/en/index.html)

WHO reference was developed only for infants ≥ 37 weeks gestation, therefore 303, (92%) infants who were full term in this study were included in this analysis.

Note the rates of SGA are lower with this WHO standard when compared to the US reference, but the magnitude and statistical significance of the changes associated with flu vaccine effect are similar
